# Supplementary material for: A SARS-CoV-2 neutralizing antibody with extensive Spike binding coverage and modified for optimal therapeutic outcomes
Source: PubMed Central journal article supplement (PMC8113581; doi:10.1038/s41467-021-22926-2), 2021-05-11
Supplement: 41467_2021_22926_MOESM1_ESM.pdf [file 41467_2021_22926_MOESM1_ESM.pdf]

1  
2  
3  
4  
5  
6  
7  
8  
9  
10  
11

**Supplementary information for**  
A SARS-CoV-2 neutralizing antibody with extensive Spike binding  
coverage and modified for optimal therapeutic outcomes

Guo et al.

Supplementary Figures 1-10  
Supplementary Tables 1-4

12

13 **Supplementary Figure 1**

a

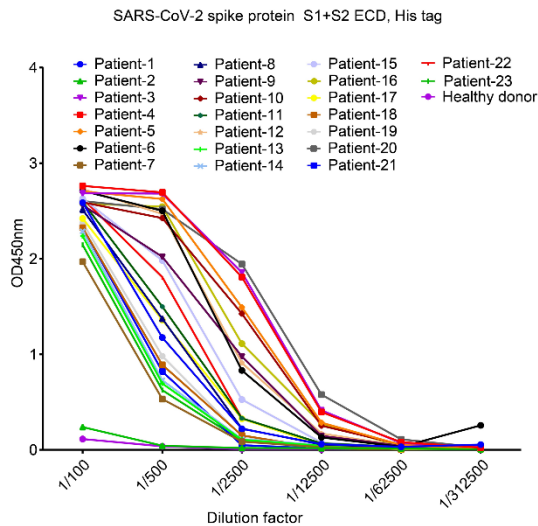

b

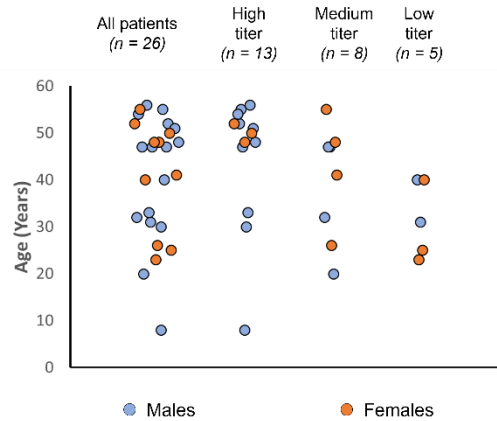

c

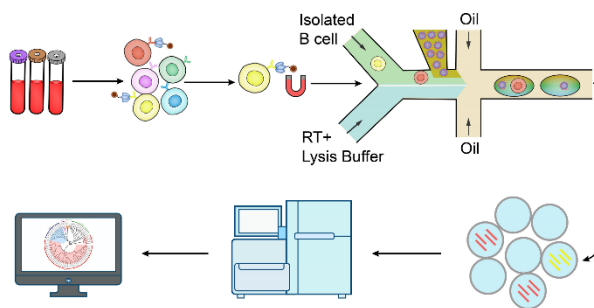

d

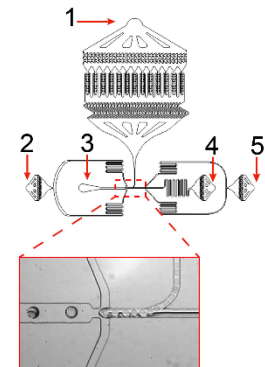

- 1 Inlet for hydrogel beads
- 2 Inlet for HFE7500
- 3 Droplet outlet
- 4 Inlet for RT mix
- 5 Inlet for cell

14

15 **Supplementary Fig.1. Analyses of antibody responses to SARS-CoV-2 proteins and antibody**  
16 **identification from convalescent patients using single B cell sequencing.**

17 (a) Serums from 23 convalescent patients and one healthy donor were analyzed for their binding  
18 abilities to the SARS-CoV-2 spike protein using ELISA. Samples at different dilutions were tested  
19 in duplicates and mean is shown. (b) Classification of patient samples into high (>2500), medium  
20 (500-2500), and low (<500) titer categories. (c) Schematic diagram of the antibody identification  
21 from convalescent patients using single B cell sequencing. SARS-CoV-2 S protein binding B cells  
22 were isolated from PBMC of convalescent patients with magnetic beads that conjugated with  
23 biotinylated S protein as probes. The isolated cells were individually co-compartmentalized in  
24 droplets along with lysis buffer, reverse transcriptase and one hydrogel bead. Each hydrogel bead

25 carried VH and VL specific oligos tagged with a unique barcode. The resulting cDNAs from one cell  
26 carried an identical barcode. The barcoded cDNAs were sequenced to identify cognate heavy and  
27 light chain pairs. (d) The design of the microfluidics chip for co-compartmentalization of single cells  
28 and single hydrogel bead in droplets.

29

30 **Supplementary Figure 2**

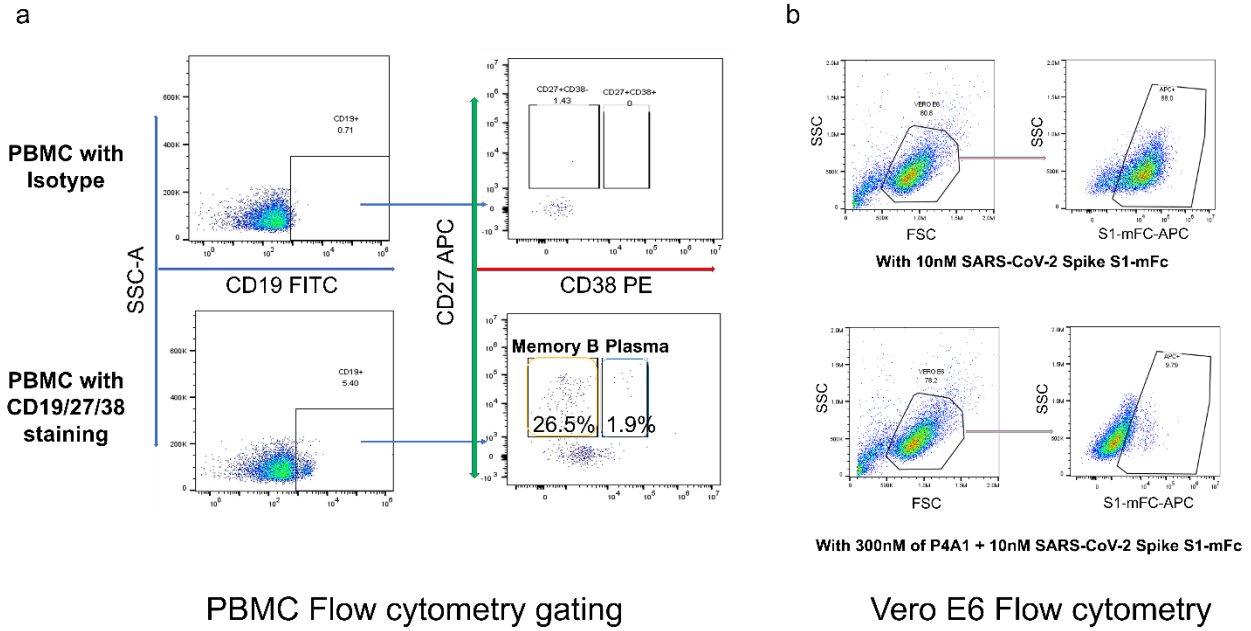

31

32 **Supplementary Fig. 2. Gating strategy for patient B cell analysis and Vero E6 cells.**

33 (a) Gating strategy for patient B cell analysis. B cells: CD19<sup>+</sup>; Memory B cells: CD19<sup>+</sup>CD27<sup>+</sup>CD38<sup>-</sup>;  
34 Plasmablasts: CD19<sup>+</sup>CD27<sup>+</sup>CD38<sup>+</sup>. (b) Gating strategy for antibody blocking of S1 binding to Vero  
35 E6 cells. Live Vero E6 cells were gated by FSC/SSC, then S1-mFc binding to Vero E6 cells were  
36 visualized by positive anti-mFc-AF647 staining.

37

38

39 **Supplementary Figure 3**

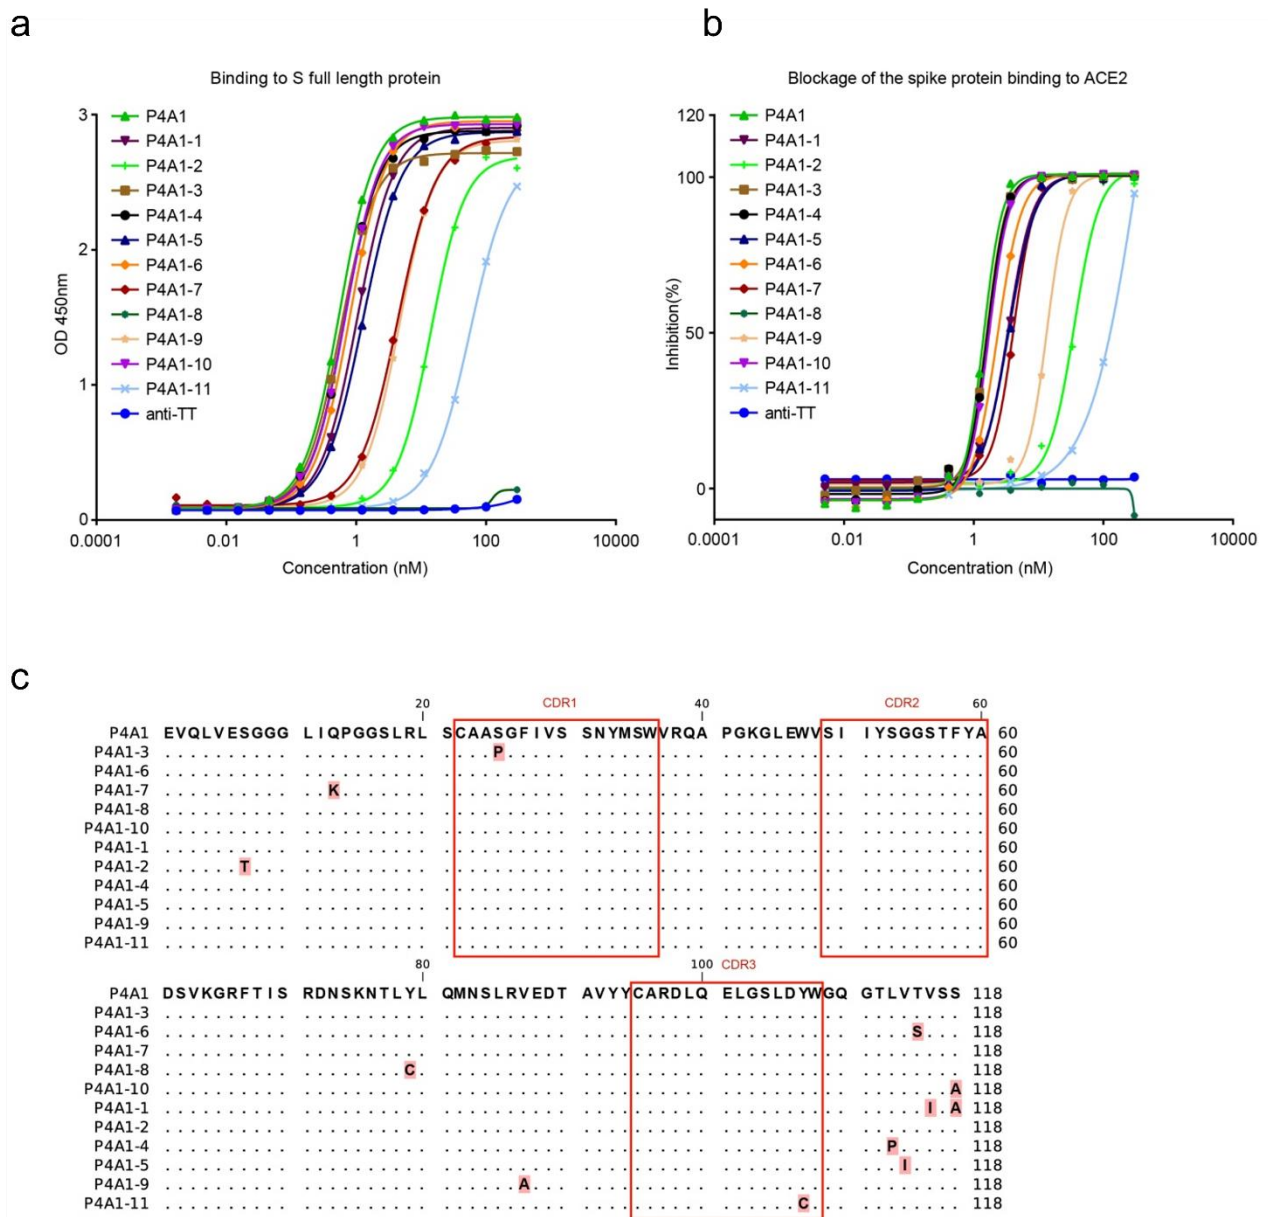

40  
 41 **Supplementary Fig.3. Identification and characterization of somatic variants of antibody P4A1.**  
 42 Eleven heavy chain sequences closely related to P4A1 were bioinformatically identified from NGS  
 43 results. These P4A1-class heavy chains were reconstituted with the light chain from P4A1 and  
 44 numbered P4A1-1 to P4A1-11. (a) Binding of the antibodies to the full-length S protein was evaluated  
 45 by ELISA. (b) Blocking the binding of S1 protein to Vero E6 cell line by antibodies was evaluated  
 46 by flow cytometry. (a) and (b), antibodies at different dilutions were tested in duplicates and mean is  
 47 shown. (c) The amino acid sequences of the P4A1-class antibodies were aligned.

48

49 **Supplementary Figure 4**

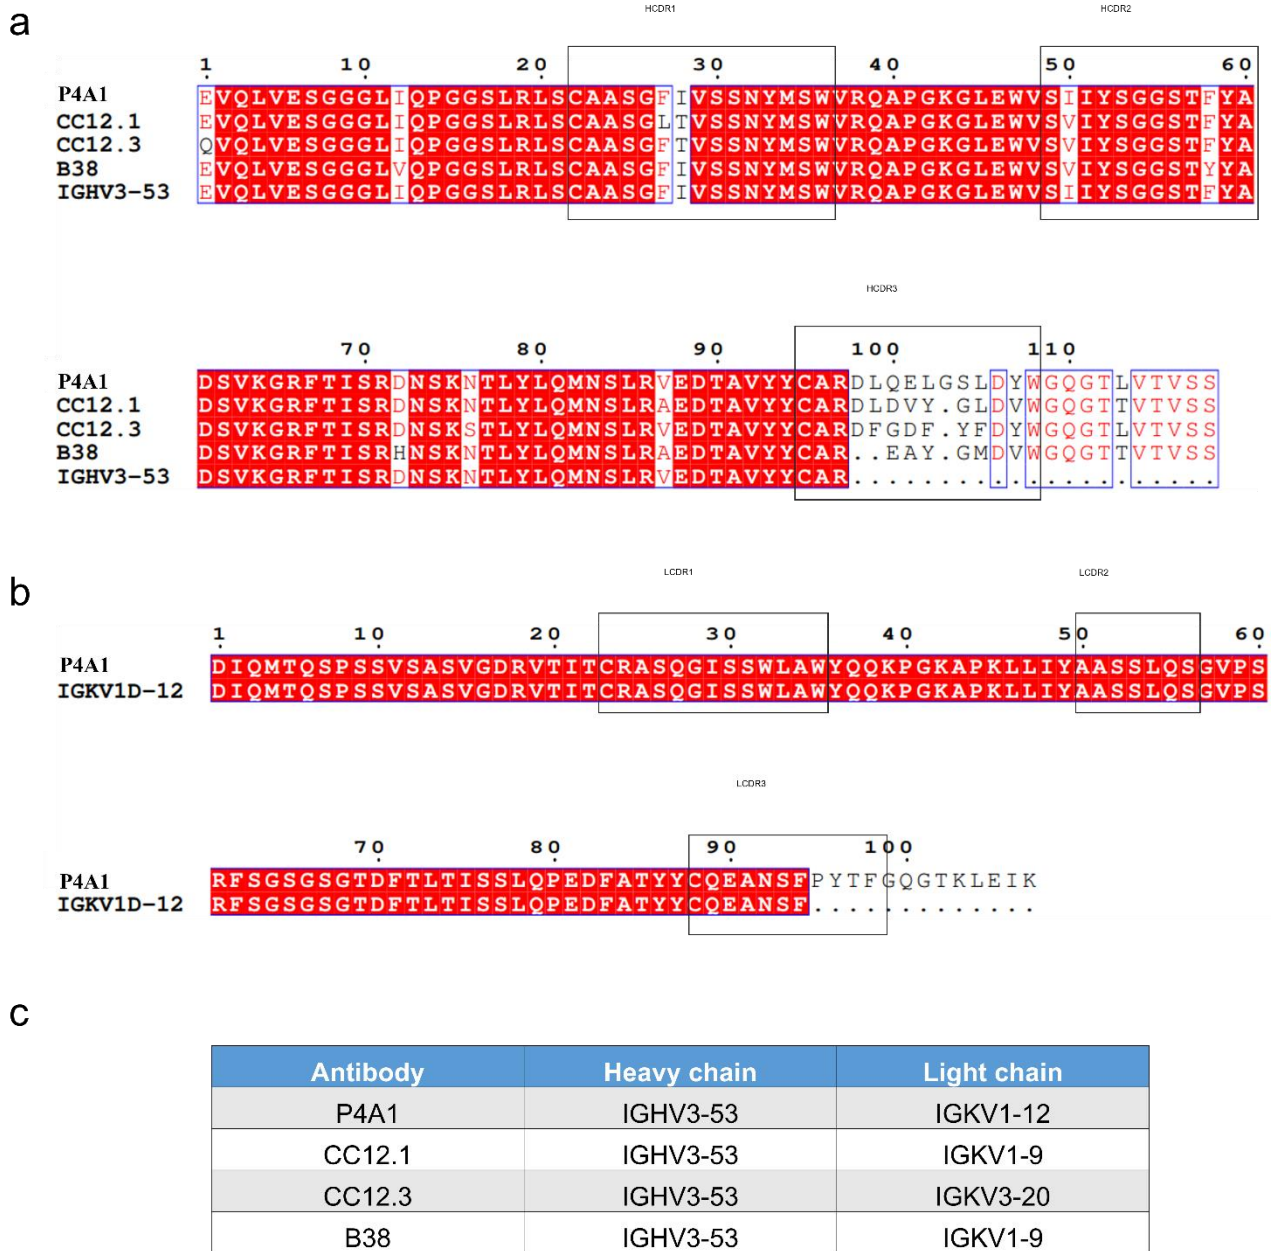

50  
 51 **Supplementary Fig.4. Sequence alignment of P4A1 to other reported antibodies from the**  
 52 **IGHV3-53 germline.** (a) Alignment of the heavy chain variable domain sequence of P4A1 with  
 53 CC12.1, CC12.3, B38 and the germline IGHV3-53 sequence. (b) Alignment of the light chain variable  
 54 domain sequence of P4A1 with the germline IGKV1D-12 sequence. (c) Germline usage comparison  
 55 of heavy chain and light chain discussed in this paper.

56 **Supplementary Figure 5**

**a**

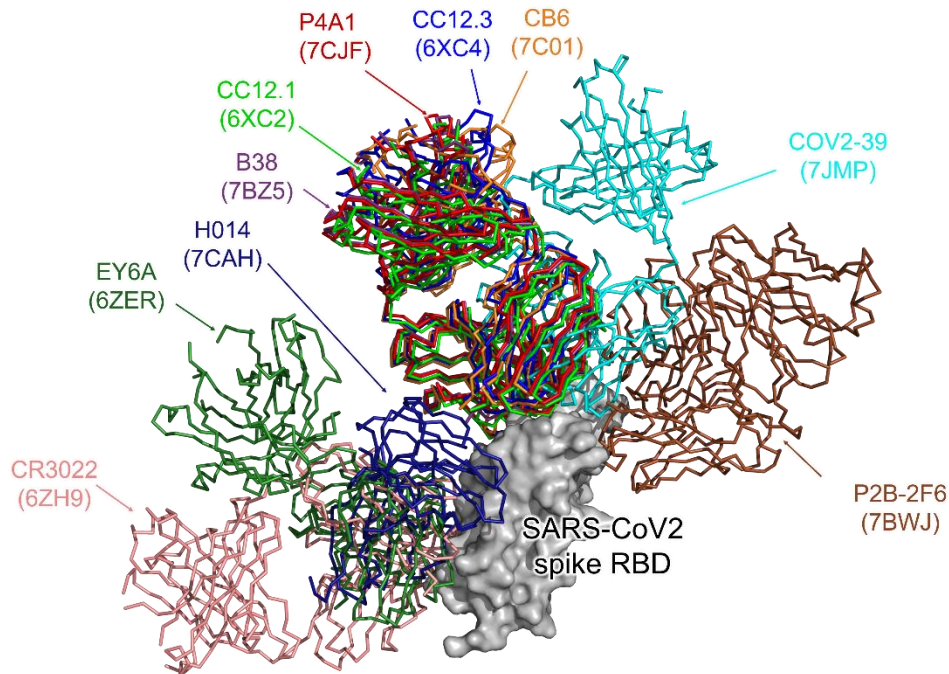

**b**

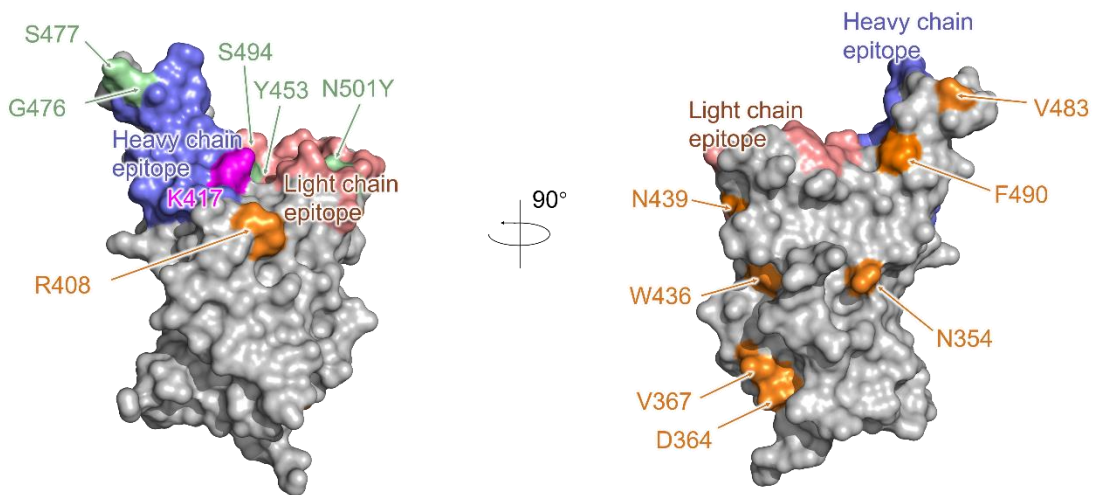

57

58 **Supplementary Fig.5. Structural comparison of the binding mode among P4A1 and several**  
 59 **reported RBD-specific neutralizing antibodies from various germ lines.** (a) Superposition of  
 60 P4A1 (red, PDB 7CJF), CC12.1 (green, PDB 6XC2), CC12.3 (blue, PDB 6XC4), B38 (purple, PDB  
 61 7BZ5), CB6 (orange, PDB 7C01), COV2-39 (cyan, PDB 7JMP), H014 (deep blue, PDB 7CAH),  
 62 EY6A (forest green, PDB 6ZER), CR3022 (salmon red, PDB 6ZH9), P2B-2F6 (brown, PDB 7BWJ),  
 63 to SARS-CoV-2 spike glycoprotein RBD (gray).

64 with Spike RBD mutations. The SARS-CoV-2 RBD is colored in gray and displayed in surface  
65 representation. The epitope of P4A1 heavy chain (slate blue), light chain (salmon red), residue K417  
66 (pink) are displayed and colored as Figure2. The clinic mutations Y453, G476, S477, S494, and  
67 N501Y, which located at the edge of the P4A1 epitope are colored in pale green. The clinic mutations  
68 N354, D364, V367, R408, W436, N439, V483, and F490, which are adjacent to the epitope residues  
69 or on the opposite side of the P4A1 epitope, are colored in orange.

70



71 **Supplementary Figure 6**

72 **a**

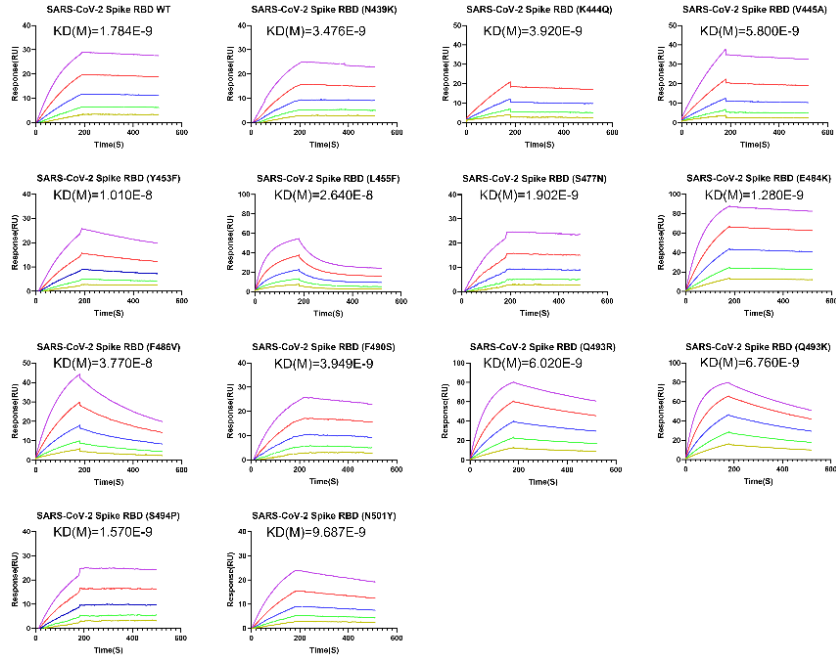

73

74 **b**

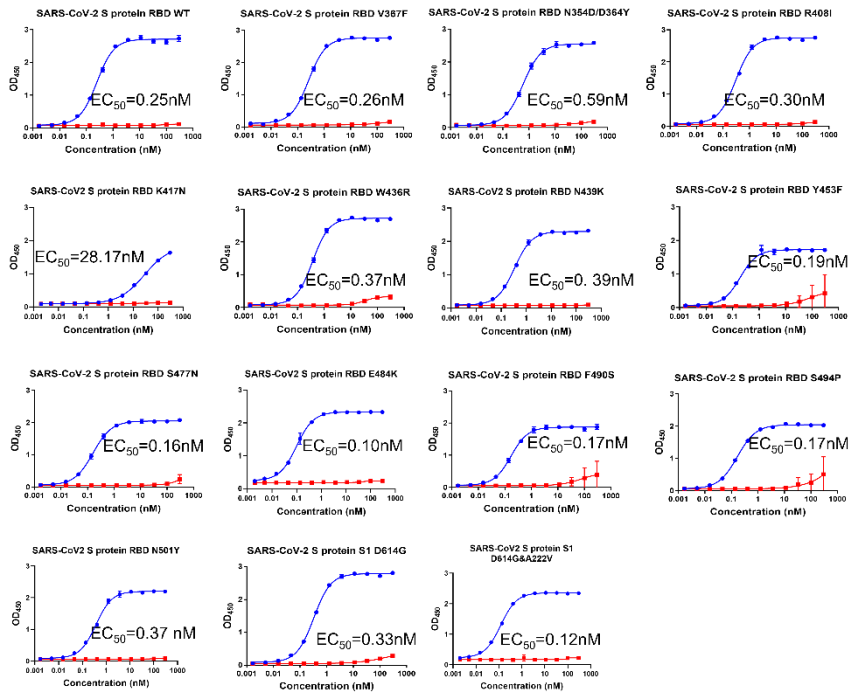

75

76 **Supplementary Fig. 6. The binding of P4A1-2A. (a) Binding affinity to WT or RBD mutants by**  
 77 **SPR. (b) Binding of P4A1-2A (blue) or isotype control (red) antibodies to the SARS-CoV-2 S**

78 **protein RBD or S1 variants was determined by ELISA.** The 384-well plates were coated with 20  
79 nM of the respective SARS-CoV-2 S protein RBD/S1 variants. The binding of P4A1-2A or isotype  
80 control antibodies (12 concentrations obtained by 3-fold serial dilutions of a 300 nM antibody stock  
81 solution, in triplicate) was detected by goat F(ab')<sub>2</sub> anti-human IgG (H+L)-HRP. Data are presented  
82 as mean ± SD. Most of the experiments were repeated once or not repeated because data from SPR  
83 or ELISA assays are supported by each other.

84 **Supplementary Figure 7**

**a**

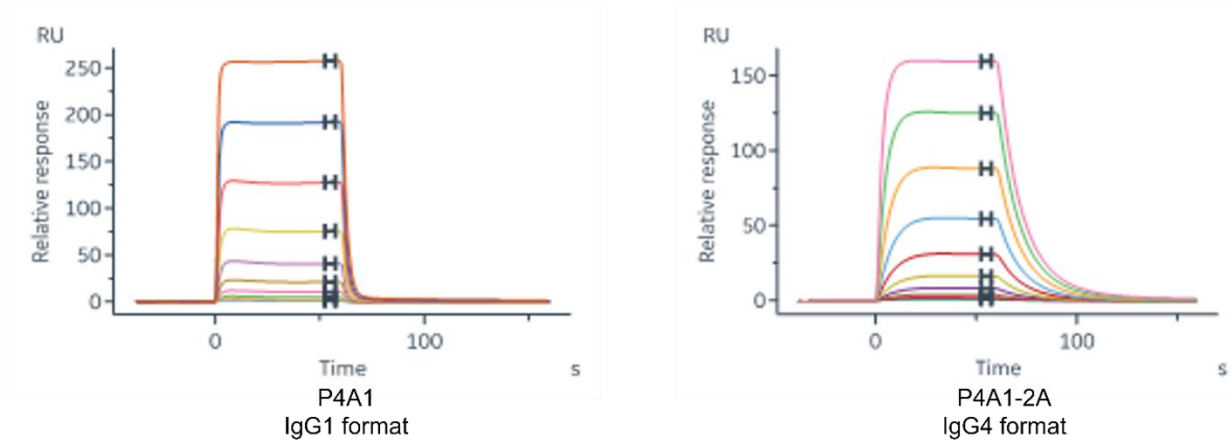

**b**

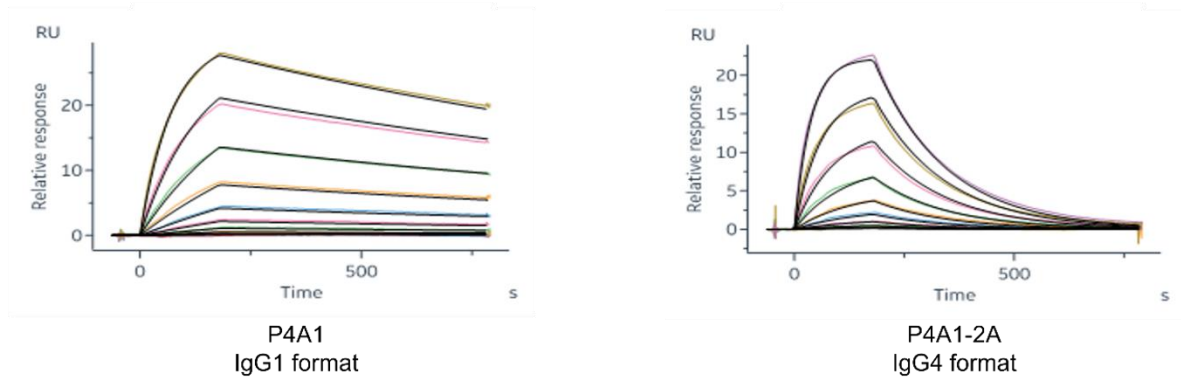

**c**

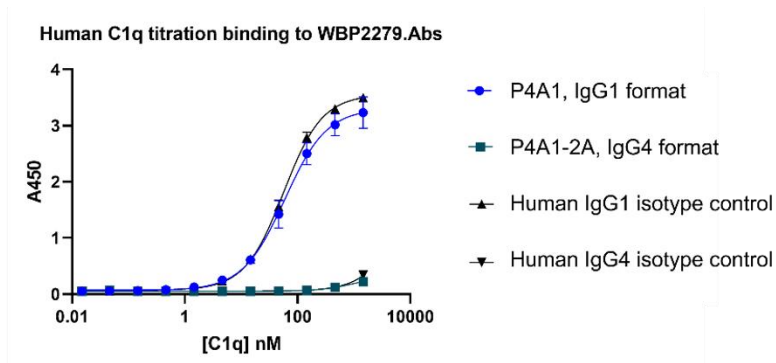

85

86 **Supplementary Fig.7. Binding of P4A1 (IgG1 form) and P4A1-2A (IgG4 form) to FcRn**  
 87 **(a), FcγRI (b) by SPR using Biacore 8K and C1q (c) by ELISA.** Assays are detailed in  
 88 material and methods. (c) C1q at different concentrations were tested in triplicates. Data are presented  
 89 as mean ± SD. Experiments were not repeated as controls were consistent with historical data and/or  
 90 literature.

91 **Supplementary Figure 8**

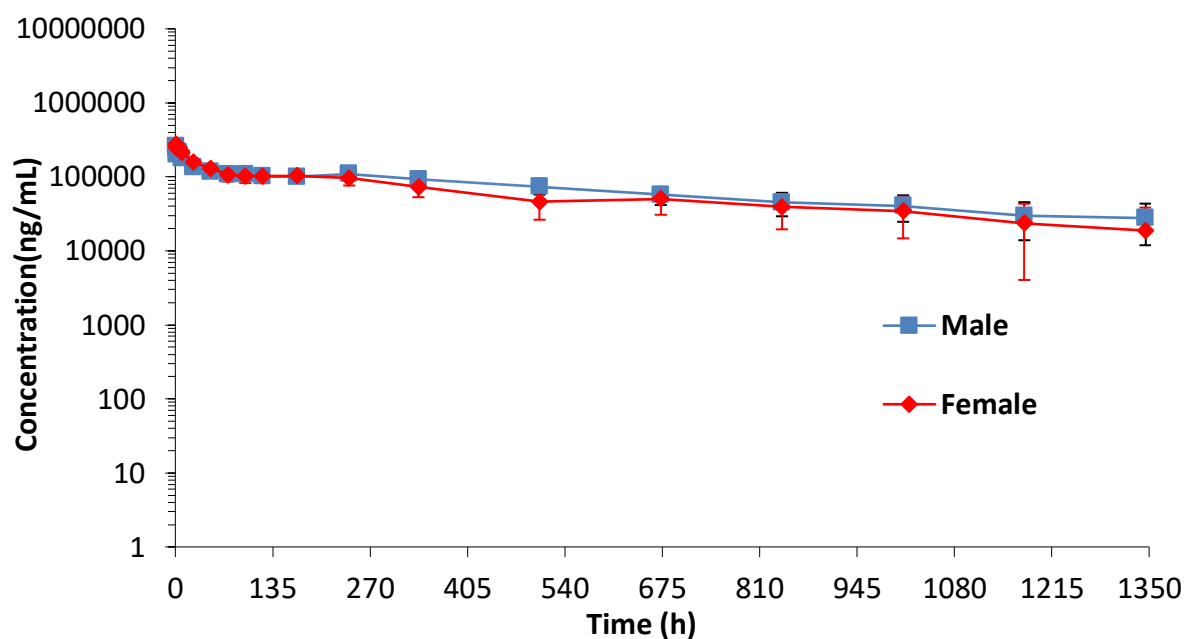

92  
93

| PK Parameter                    | Mean (Male) | Mean (Female) |
|---------------------------------|-------------|---------------|
| C <sub>max</sub> (ng/mL)        | 259000      | 273000        |
| C <sub>last</sub> (ng/mL)       | 27700       | 13000         |
| T <sub>max</sub> (h)            | 1.0833      | 1.0833        |
| T <sub>1/2</sub> (h)            | 586         | 332           |
| AUC <sub>0-last</sub> (ng.h/mL) | 88200000    | 66700000      |

94  
95  
96  
97  
98  
99  
100  
101  
102

**Supplementary Fig.8. Mean serum P4A1-2A concentration in cynomolgus monkeys.** Male and female cynomolgus monkeys (N=3/sex) were treated with a single i.v. infusion administration at 10 mg/kg P4A1-2A in 60 mins infusion time. Blood samples collected at different timepoints and serum concentrations of P4A1-2A were determined with ELISA. Data are presented as mean ± SEM (N=3/sex). PK parameters derived are listed in the lower panel.

103 **Supplementary Figure 9**

104 **a**

105 **Parameters examined**

|                                 |                                                                       |
|---------------------------------|-----------------------------------------------------------------------|
| <b>Clinical observations</b>    | 1. Tolerance at injection sites                                       |
|                                 | 2. Body weight                                                        |
|                                 | 3. Body weight change                                                 |
|                                 | 4. Qualitative food consumption                                       |
|                                 | 5. Ophthalmology                                                      |
|                                 | 6. Body temperature                                                   |
| <b>Safety pharmacology</b>      | 1. Electrocardiography                                                |
|                                 | 2. Blood pressure                                                     |
|                                 | 3. Respiration                                                        |
|                                 | 4. Neurological examination                                           |
| <b>Ophthalmology</b>            |                                                                       |
| <b>Clinical pathology</b>       | 1. Hematology                                                         |
|                                 | 2. Serum chemistry                                                    |
|                                 | 3. Coagulation                                                        |
|                                 | 4. Urinalysis                                                         |
| <b>Toxicokinetics</b>           |                                                                       |
| <b>Immunogenicity</b>           | Anti-drug-antibody (ADA)                                              |
| <b>Cytokine</b>                 | IL-2, IL-4, IL-5, IL-6, IL-10, IL-13, TNF- $\alpha$ and IFN- $\gamma$ |
| <b>Necropsy &amp; Pathology</b> | 1. Organ weight                                                       |
|                                 | 2. Gross evaluation                                                   |
|                                 | 3. Histopathology                                                     |

113 ◆ Administration of P4A1-2A at 50 or 300 mg/kg/dose once per week for 2 weeks was well tolerated and did not result in any adverse changes.

114 ◆ The no observed adverse effect level (NOAEL) for this study was considered to be 300 mg/kg/dose.

104 **b**

105 **Tissue cross-reactivity (TCR) with 37 types of frozen normal human tissues**

|                            |                             |                      |
|----------------------------|-----------------------------|----------------------|
| Adrenal                    | Fallopian Tube              | Spinal Cord          |
| Bladder                    | Heart                       | Spleen               |
| Blood cells                | Kidney (glomerulus, tubule) | Stomach              |
| Bone Marrow                | Liver                       | Striated Muscle      |
| Breast                     | Lung                        | Testis               |
| Cerebellum                 | Lymph Node                  | Thymus               |
| Cerebral Cortex            | Ovary                       | Thyroid              |
| Colon                      | Pancreas                    | Tonsil               |
| Small Intestine            | Pituitary                   | Ureter               |
| Endothelium (blood vessel) | Placenta                    | Uterus (cervix)      |
| Eye                        | Prostate                    | Uterus (endometrium) |
| Esophagus                  | Skin                        | -                    |
| Peripheral Nerve           | Salivary Gland              | -                    |

115 ◆ No positive staining was observed in a panel of 37 human tissues (with each tissue in triplicates from 3 donors) when stained with 5  $\mu$ g/mL or 25  $\mu$ g/mL Biotin-P4A1-2A. All positive and negative controls worked as expected.

118 **Supplementary Fig.9. GLP-compliant safety evaluations: (a) Toxicology study; (b) Tissue cross-reactivity study.**

119

a

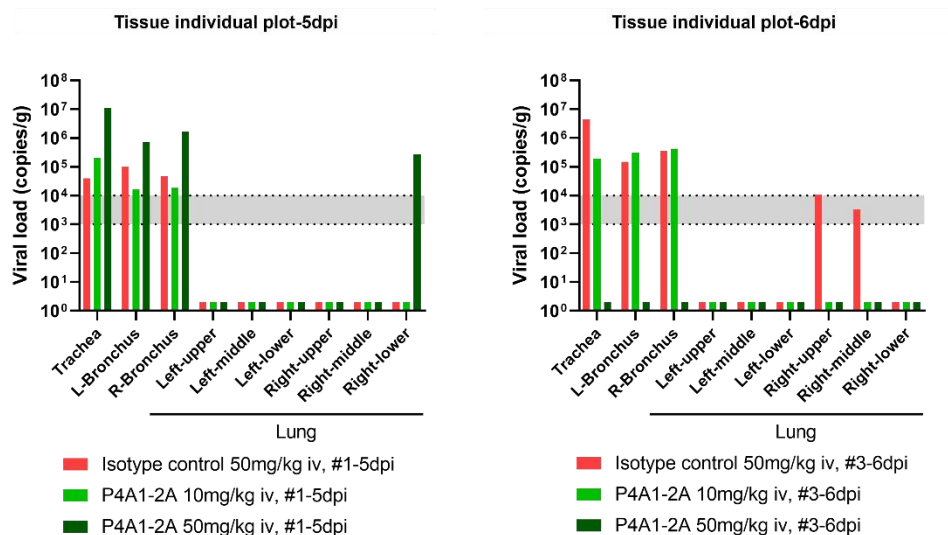

b

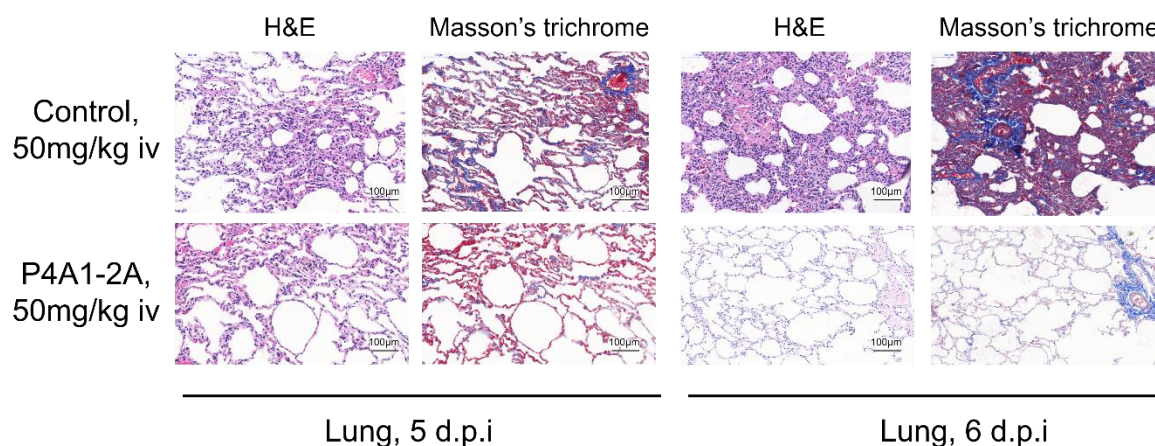

121

122

123 **Supplementary Fig.10. Viral load and histopathology in lung tissue in the rhesus macaque**  
 124 **model of SARS-CoV-2 infection 5 and 6 d.p.i.** (a) Viral load in the respiratory tissues (including  
 125 trachea, left and right bronchus, and all six lung lobes) collected at necropsy on 5 (left) or 6 (right)  
 126 days post-infection (d.p.i.; n=1/group/day) were tested by RT-qPCR. (b) Representative images of  
 127 histopathology in lung tissue from isotype control or P4A1-2A 50 mg/kg treated animals (collected  
 128 at 5 and 6 d.p.i). Experiments were not repeated as controls were consistent with historical data and/or  
 129 literature.

**Supplementary Table 1. Data collection and refinement statistics.**

|                                |                                 |
|--------------------------------|---------------------------------|
| Wavelength                     | 0.97915                         |
| Resolution range               | 36.16 - 2.108 (2.183 - 2.108)   |
| Space group                    | C 2 2 21                        |
| Unit cell                      | 85.958 148.575 144.655 90 90 90 |
| Total reflections              | 475973                          |
| Unique reflections             | 48014 (4316)                    |
| Multiplicity                   | 9.6 (9.7)                       |
| Completeness (%)               | 89.21 (81.11)                   |
| Mean I/sigma(I)                | 23.5 (2.3)                      |
| Wilson B-factor                | 32.62                           |
| R-merge                        | 0.091 (0.800)                   |
| R-meas                         | 0.097 (0.844)                   |
| R-pim                          | 0.031 (0.264)                   |
| CC1/2                          | 0.996 (0.895)                   |
| Reflections used in refinement | 47909 (4316)                    |
| Reflections used for R-free    | 1991 (185)                      |
| R-work                         | 0.1858 (0.2309)                 |
| R-free                         | 0.2284 (0.2616)                 |
| Number of non-hydrogen atoms   | 5466                            |
| macromolecules                 | 4861                            |
| ligands                        | 14                              |
| solvent                        | 591                             |
| Protein residues               | 793                             |
| RMS(bonds)                     | 0.007                           |
| RMS(angles)                    | 0.95                            |
| Ramachandran favored (%)       | 97.1                            |
| Ramachandran allowed (%)       | 2.9                             |
| Ramachandran outliers (%)      | 0                               |
| Rotamer outliers (%)           | 0.55                            |
| Clashscore                     | 4.8                             |
| Average B-factor               | 39.13                           |
| macromolecules                 | 37.67                           |
| ligands                        | 82.89                           |
| solvent                        | 50.16                           |
| Number of TLS groups           | 1                               |

Statistics for the highest-resolution shell are shown in parentheses.

133  
134**Supplementary Table 2. Residues contributed to interaction between P4A1/SARS-CoV-2-RBD.**

| SARS-CoV-2 RBD               | Distance (Å) |      |     | P4A1 Antibody    |
|------------------------------|--------------|------|-----|------------------|
| Hydrogen Bonds               |              |      |     |                  |
| SER 477 [N ]                 | 3.1          |      |     | VH:GLY 26 [O]    |
| LYS 458 [NZ]                 | 2.7          |      |     | VH:SER 30 [O]    |
| TYR 473 [OH]                 | 2.8          |      |     | VH:SER 31 [O]    |
| TYR 449[OH]                  | 4.0          |      |     | VH:SER 31[OG]    |
| LYS 458 [NZ]                 | 3.1          |      |     | VH:SER 53 [O]    |
| TYR 421 [OH]                 | 3.4          |      |     | VH:SER 53 [OG]   |
| LYS 417 [NZ]                 | 2.7          |      |     | VH:GLN 100 [OE1] |
| TYR 453 [OH]                 | 2.4          |      |     | VH:GLU 101 [OE1] |
| ASP 420 [OD2]                | 2.5          |      |     | VH:SER 56 [OG]   |
| TYR 421 [OH]                 | 3.6          |      |     | VH:SER 53 [N]    |
| TYR 421 [OH]                 | 2.9          |      |     | VH:GLY 54 [N]    |
| LEU 455 [O]                  | 2.8          |      |     | VH:TYR 33 [OH]   |
| ARG 457 [O]                  | 2.6          |      |     | VH:SER 53 [OG]   |
| ALA 475 [O]                  | 3.2          |      |     | VH:ILE 28 [N]    |
| ALA 475 [O]                  | 2.9          |      |     | VH:ASN 32 [ND2]  |
| ASN 487 [OD1]                | 2.9          |      |     | VH:ARG 97 [NH1]  |
| TYR 489 [OH]                 | 3.4          |      |     | VH:ARG 97 [NH2]  |
| GLY 502 [N]                  | 3.0          |      |     | VL:GLY 28 [O]    |
| ARG 403 [NH1]                | 2.9          |      |     | VL:ASN 92 [O]    |
| ARG 403 [NH2]                | 3.1          |      |     | VL:ASN 92 [O]    |
| TYR 505 [OH]                 | 2.7          |      |     | VL:SER 93 [OG]   |
| ASN 501 [OD1]                | 3.2          |      |     | VL:SER 30 [N]    |
| GLY 496 [O]                  | 3.0          |      |     | VL:SER 30 [OG]   |
| ASN 501 [OD1]                | 3.0          |      |     | VL:SER 30 [OG]   |
| GLN 498 [OE1]                | 3.4          |      |     | VL:SER 67 [OG]   |
| TYR 505 [OH]                 | 3.6          |      |     | VL:SER 93 [N]    |
| Salt Bridge                  |              |      |     |                  |
| LYS 417 [NZ]                 | 3.1          |      |     | VH:GLU 101 [OE2] |
| Solvent Hydrogen Bond Bridge |              |      |     |                  |
| GLY 476 [O]                  | 3.0          | W740 | 3.0 | VH: SER 31 [OG]  |
| TYR 505 [OH]                 | 2.8          | W388 | 2.8 | VL: TRP 32[O]    |
| TYR 505 [OH]                 | 2.8          | W388 | 3.1 | VL: ALA 91 [N]   |
| TYR 505 [OH]                 | 2.8          | W388 | 2.9 | VL: ASN 92 [N]   |

135

136



137 **Supplementary Table 3. PISA analysis of interaction between P4A1/SARS-CoV-2-RBD**

138

|    | Total surface area, Å <sup>2</sup> |       | Interaction residues |       | Interface area, Å <sup>2</sup> | ΔiG (kcal/m) | ΔiG (P-value) | N <sub>HB</sub> | N <sub>SB</sub> | N <sub>DS</sub> | CSS   |
|----|------------------------------------|-------|----------------------|-------|--------------------------------|--------------|---------------|-----------------|-----------------|-----------------|-------|
|    | RBD                                | HC/LC | RBD                  | HC/LC |                                |              |               |                 |                 |                 |       |
| HC | 10140                              | 11747 | 25                   | 23    | 780.7                          | -1.8         | 0.766         | 17              | 1               | 0               | 0.024 |
| LC |                                    | 11442 | 17                   | 16    | 414.6                          | 1.3          | 0.663         | 9               | 0               | 0               | 0.007 |

139

140 HC: Heavy chain; LC: Light Chain; ΔiG: Solvation free energy gain upon formation of the interface;

141 N<sub>HB</sub>: number of potential hydrogen bonds across the interface; N<sub>SB</sub>: number of potential salt bridges

142 across the interface; N<sub>DS</sub>: number of potential disulfide bonds across the interface; CSS:

143 Complexation Significance Score

144

145

146

147

**Supplementary Table 4. Overview oligonucleotide primers used in this study**

148

| Purpose                              | Gene name/purpose                           | Primer  | Sequences (5' -- 3')                                  |
|--------------------------------------|---------------------------------------------|---------|-------------------------------------------------------|
| <b>RBD expression</b>                | SARS-CoV-2 RBD                              | Forward | TCTCCTACATCTACGCCGACGGATCCACCAACCTCTGCCCTTT<br>CGGT   |
|                                      |                                             | Reverse | TGGTGATGGTGGTGATGATGTGCGGCCGCACTCTTCTTTGGC<br>CCGCATA |
| <b>In vivo study viral load qPCR</b> | SARS-CoV-2 NP                               | Forward | GGGGAACTTCTCCTGCTAGAAT                                |
|                                      |                                             | Reverse | CAGACATTTTGTCTCTCAAGCTG                               |
| <b>Single B cell sequencing</b>      | VH & VL library construction and sequencing | Forward | ACA GGT GCC CAC TCC CAG GTG CAG                       |
|                                      |                                             |         | AAG GTG TCC AGT GTG ARG TGC AG                        |
|                                      |                                             |         | CCC AGA TGG GTC CTG TCC CAG GTG CAG                   |
|                                      |                                             |         | CAA GGA GTC TGT TCC GAG GTG CAG                       |
|                                      |                                             |         | GCA GCA GCA ACA GGT GCC CAC                           |
|                                      |                                             |         | GGC CTC CCA TGG GGT GTC CTG                           |
|                                      |                                             |         | GCT GTT CTC CAA GGA GTC TGT                           |
|                                      |                                             |         | GCA GCT CCC AGA TGG GTC CTG                           |
|                                      |                                             |         | ATT TTA AGA GGT GTC CAG TGT                           |
|                                      |                                             |         | ATT TTA AAA GGT GTC CAG TGT                           |
|                                      |                                             |         | ATT TTA GAA GGT GTC CAG TGT                           |
|                                      |                                             |         | ACC CCT TCC TGG GTC TTG TCC                           |
|                                      |                                             |         | ATC CCT TCA TGG GTC TTG TCC                           |
|                                      |                                             |         | GCA GCT ACA GGC ACC CAC GCC                           |
|                                      |                                             |         | GCA GCC ACA AGT GCC CAC TCC                           |
|                                      |                                             |         | GCA GCC ACA GGT GCC CAC TCC                           |
|                                      |                                             |         | GCA GCC ACA GGA GCC CAC TCC                           |
|                                      |                                             |         | GGT CCT GGG CCC AGT CTG TGC TG                        |
|                                      |                                             |         | GGT CCT GGG CCC AGT CTG CCC TG                        |
|                                      |                                             |         | GCT CTG TGA CCT CCT ATG AGC TG                        |
| GGT CTC TCT CSC AGC YTG TGC TG       |                                             |         |                                                       |
| GTT CTT GGG CCA ATT TTA TGC TG       |                                             |         |                                                       |
| GGT CCA ATT CYC AGG CTG TGG TG       |                                             |         |                                                       |

|  |  |                                       |
|--|--|---------------------------------------|
|  |  | GAG TGG ATT CTC AGA CTG TGG TG        |
|  |  | ACT CAC TCT GCA GTG TCA GTG GTC       |
|  |  | AGT CTC CTC ACA GGG TCC CTC TCC       |
|  |  | GCT TAT GGA TCA GGA GTG GAT TCT       |
|  |  | ACT TGC TGC CCA GGG TCC AAT TC        |
|  |  | CAC TGC ACA GGT TCT TGG GCC           |
|  |  | TCT CAC TGC ACA GGT TCC CTC TC        |
|  |  | CAC TGG ACA GGG TCT CTC TCC           |
|  |  | TTC TCC ACA GGT CTC TGT GCT           |
|  |  | CTC TAC ACA GGC TCT ATT GCC           |
|  |  | CTT TGC ATA GGT TCT GTG GTT           |
|  |  | TAC TGC ACA GGA TCC GTG GCC           |
|  |  | CTC TGC ACA GGC TCT GAG GCC           |
|  |  | TAC TGC ACA GGA TCC GTG GCC           |
|  |  | CAG GGC ACA GGA TCC TGG GCT           |
|  |  | CAG GGC ACA GGG TCC TGG GCC           |
|  |  | CAC TGC ACA GGG TCC TGG GCC           |
|  |  | CAC TGT GCA GGG TCC TGG GCC           |
|  |  | ATG AGG STC CCY GCT CAG CTG CTG G     |
|  |  | CTC TTC CTC CTG CTA CTC TGG CTC CCA G |
|  |  | ATT TCT CTG TTG CTC TGG ATC TCT G     |
|  |  | TGG GTT CCA GCC TCC AGG GG            |
|  |  | TGG ATC TCT GAT ACC AGG GC            |
|  |  | TGG ATC TCT GGT GCC TAC GG            |
|  |  | TGG CTC CCA GAT ACC ACT GG            |
|  |  | TGG CTC CCA GAT ACC ACC GG            |
|  |  | CTC TGG GTC TCT GGA TCC AGT           |
|  |  | CTC TGG GTC CCA GGA TCC AGT           |
|  |  | CTC TGG GTC CCT GGA TCC AGT           |
|  |  | TGG CTC CCA GAT ACC AGA TGT           |
|  |  | TGG TTC CCA GGT TCC AGA TGC           |
|  |  | TGG CTC CCA GGT GCC AGA TGT           |

|  |  |         |                             |
|--|--|---------|-----------------------------|
|  |  |         | TGG CTC TCA GGT GCC AGA TGT |
|  |  |         | TGG CTC CGA GGT GCC AGA TGT |
|  |  | Reverse | GCCAGGGGGAAGACCGATGG        |
|  |  |         | GAGGGCGGGAACAGAGTGAC        |
|  |  |         | CAACTGCTCATCAGATGGCG        |

149

150
